# Supplementary material for: Physiological and proteomic approaches to address the active role of ozone in kiwifruit post-harvest ripening
Source: PubMed Central journal article supplement — J Exp Bot. 2012 Jan 20;63(7):2449–64. doi: 10.1093/jxb/err418 (PMC3346216; doi:10.1093/jxb/err418), 2012-01-20
Supplement: supp_err418_00070292-file001.pdf [file supp_err418_00070292-file001.pdf]

**Physiological and proteomic approaches to address the active  
role of ozone in kiwifruit postharvest ripening**

Ioannis S. Minas, Georgia Tanou, Maya Belghazi, Dominique Job, Georgios  
Manganaris, Athanassios Molassiotis and Miltiadis Vasilakakis

**Supplementary Material**

(Supplementary Table S1 and Table S2 and Supplementary Figures S1, S2 and S3)

Table S1

## Quantification of protein zones from 1D-gels of kiwifruit proteins

**Protein zones relative quantities from 1DE-gels of kiwifruit proteins**

Protein extracts have been analyzed by one-dimensional electrophoresis and 1D-gels were submitted to image analysis as described in Experimental procedures,

Legend:

Zone N°, protein zone label on the reference 1-DE gel presented in Figure 6;

**C1 (Mean)**, average of zone relative quantities of Control kiwifruits samples exposed to 1 day self-life following 5 months cold storage as obtained from densitometric analysis of individual zones from proteins in 1DE-gels stained with coomassie blue from three different gels and independent extractions;

**C6 (Mean)**, average of zone relative quantities of Control kiwifruits samples exposed to 6 days self-life following 5 months cold storage as obtained from densitometric analysis of individual zones from proteins in 1DE-gels stained with coomassie blue from three different gels and independent extractions;

**Ration Mean C6/Mean C1**, The C6 (Mean) zone relative quantity divided by the C1 (Mean) zone relative quantity;

**p values C6/C1**, p value between zone relative quantities of individual zones from three different gels and independent extractions of C1 samples and zone relative quantities of individual zones from three different gels and independent extractions of C6 samples;

**C12 (Mean)**, average of zone relative quantities of Control kiwifruits samples exposed to 12 days self-life following 5 months cold storage as obtained from densitometric analysis of individual zones from proteins in 1DE-gels stained with coomassie blue from three different gels and independent extractions;

**Ration Mean C12/Mean C1**, The C12 (Mean) zone relative quantity divided by the C1 (Mean) zone relative quantity;

**p values C12/C1**, p value between zone relative quantities of individual zones from three different gels and independent extractions of C1 samples and zone relative quantities of individual zones from three different gels and independent extractions of C12 samples;

**O1 (Mean)**, average of zone relative quantities of Ozone-treated kiwifruit samples that exposed to 1 day self-life following 5 months cold storage as obtained from densitometric analysis of individual zones from proteins in 1DE-gels stained with coomassie blue from three different gels and independent extractions;

**Ration Mean O1/Mean C1**, The O1 (Mean) zone relative quantity divided by the C1 (Mean) zone relative quantity;

**p values O1/C1**, p value between zone relative quantities of individual zones from three different gels and independent extractions of C1 samples and zone relative quantities of individual zones from three different gels and independent extractions of O1 samples;

**O6 (Mean)**, average of zone relative quantities of Ozone-treated kiwifruit samples that exposed to 6 days self-life following 5 months cold storage as obtained from densitometric analysis of individual zones from proteins in 1DE-gels stained with coomassie blue from three different gels and independent extractions;

**Ration Mean O6/Mean O1**, The O6 (Mean) zone relative quantity divided by the O1 (Mean) zone relative quantity;

**p values O6/O1**, p value between zone relative quantities of individual zones from three different gels and independent extractions of O1 samples and zone relative quantities of individual zones from three different gels and independent extractions of O6 samples;

**Ration Mean O6/Mean C6**, The O6 (Mean) zone relative quantity divided by the C6 (Mean) zone relative quantity;

**p values O6/C6**, p value between zone relative quantities of individual zones from three different gels and independent extractions of C6 plants and zone relative quantities of individual zones from three different gels and independent extractions of O6 plants;

**O12 (Mean)**, average of zone relative quantities of Ozone-treated kiwifruit samples that exposed to 12 days self-life following 5 months cold storage as obtained from densitometric analysis of individual zones from proteins in 1DE-gels stained with coomassie blue from three different gels and independent extractions;

**Ration Mean O12/Mean O1**, The O12 (Mean) zone relative quantity divided by the O1 (Mean) zone relative quantity;

**p values O12/O1**, p value between zone relative quantities of individual zones from three different gels and independent extractions of O1 samples and zone relative quantities of individual zones from three different gels and independent extractions of O12 samples;

**Ration Mean O12/Mean C12**, The O12 (Mean) zone relative quantity divided by the C12 (Mean) zone relative quantity;

**p values O12/C12**, p value between zone relative quantities of individual zones from three different gels and independent extractions of C12 samples and zone relative quantities of individual zones from three different gels and independent extractions of O12 samples.

| Zone N° | C1 (Mean) | C6 (Mean) | Ratio Mean C6/Mean C1 | p values C6/C1 | C12 (Mean) | Ratio Mean C12/Mean C1 | p values C12/C1 | O1 (Mean) | Ratio Mean O1/Mean C1 | p values O1/C1 | O6 (Mean) | Ratio Mean O6/Mean O1 | p values O6/O1 | Ratio Mean O6/Mean C6 | p values O6/C6 | O12 (Mean) | Ratio Mean O12/Mean O1 | p values O12/O1 | Ratio Mean O12/Mean C12 | p values O12/C12 |
|---------|-----------|-----------|-----------------------|----------------|------------|------------------------|-----------------|-----------|-----------------------|----------------|-----------|-----------------------|----------------|-----------------------|----------------|------------|------------------------|-----------------|-------------------------|------------------|
| 1       | 29        | 21        | 0,72                  | 0,52           | 22         | 0,76                   | 0,53            | 38        | 1,31                  | 0,58           | 26        | 0,68                  | 0,47           | 1,24                  | 0,68           | 28         | 0,74                   | 0,46            | 1,27                    | 0,40             |
| 2       | 29        | 21        | 0,72                  | 0,24           | 22         | 0,76                   | 0,49            | 32        | 1,10                  | 0,79           | 26        | 0,81                  | 0,58           | 1,24                  | 0,27           | 23         | 0,72                   | 0,39            | 1,05                    | 0,97             |
| 3       | 49        | 33        | 0,67                  | 0,30           | 42         | 0,86                   | 0,71            | 54        | 1,10                  | 0,77           | 39        | 0,72                  | 0,50           | 1,18                  | 0,75           | 41         | 0,76                   | 0,45            | 0,98                    | 0,94             |
| 4       | 50        | 153       | 3,06                  | 0,00           | 269        | 5,38                   | 0,00            | 50        | 1,00                  | 0,98           | 67        | 1,34                  | 0,32           | 0,44                  | 0,01           | 146        | 2,92                   | 0,01            | 0,54                    | 0,00             |
| 5       | 94        | 121       | 1,29                  | 0,65           | 114        | 1,21                   | 0,64            | 112       | 1,19                  | 0,69           | 115       | 1,03                  | 0,94           | 0,95                  | 0,91           | 118        | 1,05                   | 0,88            | 1,04                    | 0,90             |
| 6       | 119       | 123       | 1,03                  | 0,88           | 105        | 0,88                   | 0,46            | 120       | 1,01                  | 0,97           | 109       | 0,91                  | 0,74           | 0,89                  | 0,68           | 115        | 0,96                   | 0,87            | 1,10                    | 0,62             |
| 7       | 70        | 61        | 0,87                  | 0,44           | 49         | 0,70                   | 0,32            | 62        | 0,89                  | 0,79           | 51        | 0,82                  | 0,68           | 0,84                  | 0,26           | 47         | 0,76                   | 0,63            | 0,96                    | 0,94             |
| 8       | 65        | 60        | 0,91                  | 0,82           | 84         | 1,29                   | 0,40            | 96        | 1,48                  | 0,18           | 71        | 0,74                  | 0,23           | 1,18                  | 0,64           | 73         | 0,76                   | 0,21            | 0,87                    | 0,54             |
| 9       | 877       | 881       | 1,00                  | 0,97           | 989        | 1,13                   | 0,31            | 1401      | 1,60                  | 0,01           | 1327      | 0,95                  | 0,57           | 1,51                  | 0,02           | 1211       | 0,86                   | 0,24            | 1,22                    | 0,16             |
| 10      | 36        | 27        | 0,75                  | 0,12           | 28         | 0,78                   | 0,11            | 42        | 1,17                  | 0,53           | 29        | 0,69                  | 0,30           | 1,07                  | 0,89           | 33         | 0,79                   | 0,61            | 1,18                    | 0,70             |
| 11      | 48        | 33        | 0,69                  | 0,43           | 42         | 0,88                   | 0,75            | 54        | 1,13                  | 0,82           | 43        | 0,80                  | 0,71           | 1,30                  | 0,60           | 42         | 0,78                   | 0,64            | 1,00                    | 1,00             |
| 12      | 38        | 37        | 0,97                  | 0,93           | 56         | 1,47                   | 0,44            | 54        | 1,42                  | 0,19           | 42        | 8,00                  | 0,68           | 1,14                  | 0,86           | 53         | 0,98                   | 0,88            | 0,95                    | 0,89             |
| 13      | 144       | 100       | 0,69                  | 0,13           | 143        | 0,99                   | 0,98            | 100       | 0,69                  | 0,15           | 119       | 1,19                  | 0,62           | 1,19                  | 0,60           | 129        | 1,29                   | 0,57            | 0,90                    | 0,80             |
| 14      | 145       | 427       | 2,94                  | 0,00           | 378        | 2,61                   | 0,00            | 161       | 1,11                  | 0,57           | 256       | 1,59                  | 0,03           | 0,60                  | 0,00           | 192        | 1,19                   | 0,23            | 0,51                    | 0,00             |
| 15      | 283       | 520       | 1,84                  | 0,00           | 542        | 1,92                   | 0,00            | 272       | 0,96                  | 0,69           | 401       | 1,47                  | 0,01           | 0,77                  | 0,02           | 485        | 1,78                   | 0,01            | 0,89                    | 0,09             |
| 16      | 48        | 33        | 0,69                  | 0,34           | 35         | 0,73                   | 0,50            | 45        | 0,94                  | 0,91           | 46        | 1,02                  | 0,99           | 1,39                  | 0,62           | 40         | 0,89                   | 0,79            | 1,14                    | 0,76             |
| 17      | 23        | 20        | 0,87                  | 0,45           | 27         | 1,17                   | 0,82            | 31        | 1,35                  | 0,39           | 25        | 0,81                  | 0,58           | 1,25                  | 0,62           | 23         | 0,74                   | 0,34            | 0,85                    | 0,77             |
| 18      | 51        | 76        | 1,49                  | 0,07           | 144        | 2,82                   | 0,00            | 64        | 1,25                  | 0,36           | 75        | 1,17                  | 0,46           | 0,99                  | 0,95           | 137        | 2,14                   | 0,01            | 0,95                    | 0,65             |
| 19      | 48        | 47        | 0,98                  | 0,87           | 36         | 0,75                   | 0,11            | 44        | 0,92                  | 0,79           | 34        | 0,77                  | 0,61           | 0,72                  | 0,44           | 38         | 0,86                   | 0,74            | 1,06                    | 0,84             |
| 20      | 57        | 57        | 1,00                  | 1,00           | 50         | 0,88                   | 0,72            | 57        | 1,00                  | 0,98           | 40        | 0,70                  | 0,21           | 0,70                  | 0,42           | 55         | 0,96                   | 0,92            | 1,10                    | 0,81             |
| 21      | 13106     | 11715     | 0,89                  | 0,29           | 10231      | 0,78                   | 0,06            | 12607     | 0,96                  | 0,59           | 11239     | 0,89                  | 0,35           | 0,96                  | 0,77           | 11706      | 0,93                   | 0,32            | 1,14                    | 0,50             |
| 22      | 2392      | 2016      | 0,84                  | 0,39           | 1744       | 0,73                   | 0,31            | 2463      | 1,03                  | 0,89           | 2809      | 1,14                  | 0,57           | 1,39                  | 0,18           | 2570       | 1,04                   | 0,68            | 1,47                    | 0,13             |
| 23      | 2348      | 2418      | 1,03                  | 0,70           | 2425       | 1,03                   | 0,60            | 2134      | 0,91                  | 0,18           | 2526      | 1,18                  | 0,19           | 1,04                  | 0,71           | 2145       | 1,01                   | 0,95            | 0,88                    | 0,20             |
| 24      | 3950      | 4356      | 1,10                  | 0,12           | 4030       | 1,02                   | 0,77            | 3987      | 1,01                  | 0,86           | 4163      | 1,04                  | 0,64           | 0,96                  | 0,61           | 3891       | 0,98                   | 0,89            | 0,97                    | 0,84             |
| 25      | 1984      | 2000      | 1,01                  | 0,98           | 2372       | 1,20                   | 0,37            | 1765      | 0,89                  | 0,80           | 2285      | 1,29                  | 0,52           | 1,14                  | 0,69           | 1533       | 0,87                   | 0,76            | 0,65                    | 0,12             |
| 26      | 2346      | 2456      | 1,05                  | 0,82           | 3662       | 1,56                   | 0,01            | 2155      | 0,92                  | 0,63           | 2096      | 0,97                  | 0,88           | 0,85                  | 0,69           | 3234       | 1,50                   | 0,02            | 0,88                    | 0,08             |
| 27      | 61        | 62        | 1,02                  | 0,95           | 53         | 0,87                   | 0,41            | 77        | 1,26                  | 0,55           | 66        | 0,86                  | 0,77           | 1,06                  | 0,92           | 53         | 0,69                   | 0,39            | 1,00                    | 0,97             |
| 28      | 1173      | 1743      | 1,49                  | 0,15           | 1610       | 1,37                   | 0,23            | 1339      | 1,14                  | 0,72           | 1558      | 1,16                  | 0,56           | 0,89                  | 0,39           | 1194       | 0,89                   | 0,73            | 0,74                    | 0,18             |
| 29      | 1932      | 2113      | 1,09                  | 0,30           | 2172       | 1,12                   | 0,34            | 2098      | 1,09                  | 0,65           | 2324      | 1,11                  | 0,63           | 1,10                  | 0,55           | 2047       | 0,98                   | 0,88            | 0,94                    | 0,59             |
| 30      | 397       | 459       | 1,16                  | 0,24           | 490        | 1,23                   | 0,07            | 405       | 1,02                  | 0,85           | 423       | 1,04                  | 0,61           | 0,92                  | 0,38           | 421        | 1,04                   | 0,74            | 0,86                    | 0,15             |
| 31      | 479       | 611       | 1,28                  | 0,36           | 591        | 1,23                   | 0,43            | 497       | 1,04                  | 0,90           | 517       | 1,04                  | 0,90           | 0,85                  | 0,54           | 407        | 0,82                   | 0,54            | 0,69                    | 0,22             |

**Table S2**

The list and detailed information of the identified kiwifruit proteins

| Zone No <sup>a</sup> | Acces. Number <sup>b</sup> | Protein name <sup>c</sup>                | Organism <sup>d</sup>       | Subcellular localization <sup>e</sup> | Matching criteria <sup>f</sup>                                 | Functional categories <sup>g</sup>                          | Carbonylation status <sup>h</sup> | Theor. pI/Mw <sup>i</sup> | % cov <sup>j</sup> | Score <sup>k</sup> | MW     | emPAI <sup>l</sup> | Peptides  |            |                                         |
|----------------------|----------------------------|------------------------------------------|-----------------------------|---------------------------------------|----------------------------------------------------------------|-------------------------------------------------------------|-----------------------------------|---------------------------|--------------------|--------------------|--------|--------------------|-----------|------------|-----------------------------------------|
|                      |                            |                                          |                             |                                       |                                                                |                                                             |                                   |                           |                    |                    |        |                    | m/z       | Mass (exp) | Sequences <sup>m</sup>                  |
| 1                    | gi 15293147                | Zinc finger (Ran-binding) family protein | <i>Arabidopsis thaliana</i> | Chloroplast                           | 100% to gi 18405190 <i>Arabidopsis thaliana</i> , E value: 0.0 | 04.05.01.04-Transcription/transcriptional control           | N                                 | 6.72 / 94747              | 2                  | 61                 | 94747  | NA                 | 433.6970  | 865.3794   | K.DTGVGDFR.N                            |
|                      |                            |                                          |                             |                                       |                                                                |                                                             |                                   |                           |                    |                    |        |                    | 546.7087  | 1091.4028  | R.GSNGSSANRSR.G                         |
| 2                    | gi 414979                  | Ferredoxin-dependent glutamate synthase  | <i>Spinacia oleracea</i>    | Cytosol                               |                                                                | 01.01-Metabolism/Amino acid                                 | N                                 | 5.82 / 161734             | 1                  | 132                | 161734 | 0.05               | 567.2051  | 1132.3956  | R.LCEAADEAVR.N + Carbamidomethyl (C)    |
|                      |                            |                                          |                             |                                       |                                                                |                                                             |                                   |                           |                    |                    |        |                    | 721.8458  | 1441.6770  | K.LVAEAGIGTVASGVAK.G                    |
| 3                    |                            | Unidentified                             |                             |                                       |                                                                | 30-Unknown                                                  | N                                 |                           |                    |                    |        |                    |           |            |                                         |
| 4                    | gi 2267006                 | HSP 70                                   | <i>Oryza sativa</i>         | Endoplasmic reticulum                 |                                                                | 06.01-Protein destination and storage/Folding and stability | N                                 | 5.30 / 73495              | 11                 | 378                | 73495  | 0.18               | 495.2370  | 988.4594   | R.LSQEIDR.M                             |
|                      |                            |                                          |                             |                                       |                                                                |                                                             |                                   |                           |                    |                    |        |                    | 499.7431  | 997.4716   | K.NQAAVNPET                             |
|                      |                            |                                          |                             |                                       |                                                                |                                                             |                                   |                           |                    |                    |        |                    | 578.3146  | 1154.6146  | K.DAGVIAGLNVAR.I                        |
|                      |                            |                                          |                             |                                       |                                                                |                                                             |                                   |                           |                    |                    |        |                    | 754.8508  | 1507.6870  | R.ITPSWVAFTDSER.L                       |
|                      |                            |                                          |                             |                                       |                                                                |                                                             |                                   |                           |                    |                    |        |                    | 830.4340  | 1658.8534  | R.IINEPTAAAIAYGLDK.K                    |
|                      |                            |                                          |                             |                                       |                                                                |                                                             |                                   |                           |                    |                    |        |                    | 1027.9727 | 2053.9308  | R.VEIESLFDGTDSEPLTR.A                   |
|                      | gi 7939619                 | Beta-galactosidase                       | <i>Solanum lycopersicum</i> | Apoplast                              |                                                                | 01.05-Metabolism/Sugars and polysaccharides                 | N                                 | 8.54 / 92864              | 2                  | 129                | 92864  | 0.08               | 641.2565  | 1280.4984  | K.CLSNCGEASQR.W + 2 Carbamidomethyl (C) |
|                      |                            |                                          |                             |                                       |                                                                |                                                             |                                   |                           |                    |                    |        |                    | 648.2650  | 1294.5154  | K.KLSNCGEASQR.W                         |
|                      |                            |                                          |                             |                                       |                                                                |                                                             |                                   |                           |                    |                    |        |                    | 701.8378  | 1401.6610  | R.STPEMWPGIIQK.A + Oxidation (M)        |
| 5                    | gi 6969976                 | HSP 70                                   | <i>Malus x domestica</i>    | Cytosol                               |                                                                | 06.01-Protein destination and storage/Folding and stability | N                                 | 5.17 / 71171              | 10                 | 291                | 71171  | 0.29               | 640.8095  | 1279.6044  | R.EIAEAYLGSSIK.N                        |
|                      |                            |                                          |                             |                                       |                                                                |                                                             |                                   |                           |                    |                    |        |                    | 693.8479  | 1385.6812  | K.ELESICNPIAK.M + Carbamidomethyl (C)   |
|                      |                            |                                          |                             |                                       |                                                                |                                                             |                                   |                           |                    |                    |        |                    | 744.3309  | 1486.6472  | R.TTPSYVAFTDTER.L                       |
|                      |                            |                                          |                             |                                       |                                                                |                                                             |                                   |                           |                    |                    |        |                    | 830.4066  | 1658.7986  | R.IINEPTAAAIAYGLDK.K                    |
|                      |                            |                                          |                             |                                       |                                                                |                                                             |                                   |                           |                    |                    |        |                    | 840.8955  | 1679.7764  | K.NAVVTVPAYFNDSQR.Q                     |

|              |                            |                             |                            |             |                                                             |                                              |              |              |     |       |       |          |           |                                                                                                                                                                       |                                                                                                                                                                                          |
|--------------|----------------------------|-----------------------------|----------------------------|-------------|-------------------------------------------------------------|----------------------------------------------|--------------|--------------|-----|-------|-------|----------|-----------|-----------------------------------------------------------------------------------------------------------------------------------------------------------------------|------------------------------------------------------------------------------------------------------------------------------------------------------------------------------------------|
| gi 123656    | HSP 70                     | <i>Spinacia oleracea</i>    | Chloroplast                |             | 06.01-Protein destination and storage/Folding and stability | N                                            | 5.34 / 71686 | 10           | 258 | 71686 | 0.22  | 640.8095 | 1279.6044 | K.EIAEAYLGSTVK.N<br>K.ELESICNPIIAK.M + Carbamidomethyl (C)<br>R.TTPSYVAFTDSER.L<br>830.4066 1658.7986 R.IINEPTAAAIA YGLDK.K<br>840.8955 1679.7764 K.NAVVTVPAYFNDSQR.Q |                                                                                                                                                                                          |
| gi 225434994 | HSP 70 ATP binding isoform | <i>Vitis vinifera</i>       | Unclear                    |             | 06.01-Protein destination and storage/Folding and stability | N                                            | 5.14 / 71297 | 8            | 251 | 71297 | 0.23  | 693.8479 | 1385.6812 | K.ELESICNPIIAK.M + Carbamidomethyl (C)<br>R.TTPSYVAFTDTER.L<br>830.4066 1658.7986 R.IINEPTAAAIA YGLDK.K<br>840.8955 1679.7764 K.NAVVTVPAYFNDSQR.Q                     |                                                                                                                                                                                          |
| gi 15223533  | HSP 70 early responsive to | <i>Arabidopsis thaliana</i> | Cytosol                    |             | 06.01-Protein destination and storage/Folding and stability | N                                            | 5.22 / 68314 | 9            | 197 | 68314 | 0.17  | 640.8095 | 1279.6044 | R.EIAEAYLGSSIK.N<br>R.TTPSYVAFTDSER.L<br>830.4066 1658.7986 R.IINEPTAAAIA YGLDK.K<br>840.8955 1679.7764 K.NAVVTVPAYFNDSQR.Q                                           |                                                                                                                                                                                          |
| 6            | gi 224092266               | Malate dehydrogenase        | <i>Populus trichocarpa</i> | Cytosol     | 99% to gi 255550956 <i>Ricinus communis</i> , E value: 0.0  | 02.10-Energy/TCA pathway                     | N            | 6.63 / 63056 | 2   | 99    | 63056 | 0.06     | 408.2159  | 814.4172                                                                                                                                                              | K.APLEETR.K<br>430.7483 859.4820 K.IWLVDISK.G                                                                                                                                            |
| 7            | gi 27805582                | Maturase                    | <i>Phoenix dactylifera</i> | Chloroplast |                                                             | 04.22-Transcription/mRNA processing          | N            | 9.50 / 61445 | 1   | 54    | NA    | 491.7240 | 981.4334  | R.FSCAGTLAR.K + Carbamidomethyl (C)<br>491.7254 981.4362 R.FSCANTLAR.K                                                                                                |                                                                                                                                                                                          |
| 8            | gi 224136806               | Enolase                     | <i>Populus trichocarpa</i> | Cytosol     | 100% to gi 255539693 <i>Ricinus communis</i> , E value: 0.0 | 02.01-Energy/Glycolysis                      | N            | 5.67 / 47897 | 12  | 253   | 47898 | 0.35     | 401.2318  | 800.4490                                                                                                                                                              | K.EGLELLK.T<br>456.2119 910.4092 R.DGGSDYLK.G<br>459.7583 917.5020 K.SCNALLK.V + Carbamidomethyl (C)<br>754.3864 1506.7582 R.IEEELGSAAVYAGAK.F<br>787.4296 1572.8446 K.VNQIGSVTESIEAVK.M |
|              | gi 147838248               | Agglutinin                  | <i>Vitis vinifera</i>      | Cytosol     | 99% to gi 57233444 <i>Triticum aestivum</i> , E             | 03.26-Cell growth/division/Growth regulators | N            | 5.58 / 53256 | 3   | 92    | 53256 | 0.07     | 507.2876  | 1012.5606                                                                                                                                                             | R.VDKNVVALR.N                                                                                                                                                                            |

value: 2e-102

|             |                                |                                         |                            |                                                                           |                                                   |                                |              |              |     |       |       |          |           |                                          |                  |
|-------------|--------------------------------|-----------------------------------------|----------------------------|---------------------------------------------------------------------------|---------------------------------------------------|--------------------------------|--------------|--------------|-----|-------|-------|----------|-----------|------------------------------------------|------------------|
| gi 21487    | Leucine aminopeptidase         | <i>Solanum tuberosum</i>                | Chloroplast                |                                                                           | 06.13-Protein destination and storage/Proteolysis | N                              | 5.75 / 58144 | 4            | 85  | 58144 | 0.13  | 540.7498 | 1079.4850 | R.NLGNNNFCK.R + Carbamidomethyl (C)      |                  |
|             |                                |                                         |                            |                                                                           |                                                   |                                |              |              |     |       |       | 636.3203 | 1270.6260 | K.GLTFDSSGGYNLK.T                        |                  |
|             |                                |                                         |                            |                                                                           |                                                   |                                |              |              |     |       |       | 659.8163 | 1317.6180 | K.TIEVNNTDAEGR.L                         |                  |
| gi 1483563  | Leucine aminopeptidase         | <i>Petroselinum crispum</i>             | Cytosol                    |                                                                           | 06.13-Protein destination and storage/Proteolysis | N                              | 5.33 / 30831 | 8            | 85  | 30831 | 0.13  | 636.3203 | 1270.6260 | K.GLTFDSSGGYNIK.T                        |                  |
|             |                                |                                         |                            |                                                                           |                                                   |                                |              |              |     |       |       | 659.8163 | 1317.6180 | K.TIEVNNTDAEGR.L                         |                  |
| gi 39818375 | ATP synthase (F1) subunit beta | <i>Solanum tuberosum</i>                | Mitochondria               | 94% to gi 114421 <i>Nicotiana glauca</i> plumbaginifolia. E value: 7e-111 | 07.22-Transporters/Transport ATPases              | N                              | 9.14 / 34107 | 11           | 167 | 34107 | 0.37  | 587.3332 | 1172.6518 | K.VVDLLAPYQR.G                           |                  |
|             |                                |                                         |                            |                                                                           |                                                   |                                |              |              |     |       |       | 640.3279 | 1278.6412 | K.ITDEFTGAGAIGK.V                        |                  |
|             |                                |                                         |                            |                                                                           |                                                   |                                |              |              |     |       |       | 705.4077 | 1408.8008 | R.VLNTGSPITVPVGR.S                       |                  |
| 9           | gi 160419153                   | Pectinesterase                          | <i>Actinidia deliciosa</i> | Apoplast                                                                  |                                                   | 09.01-Cell structure/Cell wall | N            | 6.67 / 35346 | 24  | 347   | 35346 | 0.66     | 635.2999  | 1268.5852                                | R.GISFENYAGPSK.H |
|             |                                |                                         |                            |                                                                           |                                                   |                                |              |              |     |       |       | 641.3004 | 1280.5862 | K.TNLMFIGDGIGK.T + Oxidation (M)         |                  |
|             |                                |                                         |                            |                                                                           |                                                   |                                |              |              |     |       |       | 682.8447 | 1363.6748 | R.SSTVAVVGTGFIAR.G                       |                  |
|             |                                |                                         |                            |                                                                           |                                                   |                                |              |              |     |       |       | 717.7950 | 1433.5754 | K.EGAYFEYVDVVK.K                         |                  |
|             |                                |                                         |                            |                                                                           |                                                   |                                |              |              |     |       |       | 751.3982 | 1500.7818 | K.VAAAADLIPVLSSF.K.T                     |                  |
|             |                                |                                         |                            |                                                                           |                                                   |                                |              |              |     |       |       | 844.8575 | 1687.7004 | R.DDPNQTGISILNCK.V + Carbamidomethyl (C) |                  |
| gi 119354   | Enolase                        | <i>Solanum lycopersicum</i>             | Cytosol                    |                                                                           | 02.01-Energy/Glycolysis                           | N                              | 5.68 / 47768 | 10           | 293 | 47768 | 0.25  | 401.2166 | 800.4186  | K.EGLELLK.T                              |                  |
|             |                                |                                         |                            |                                                                           |                                                   |                                |              |              |     |       |       | 456.1897 | 910.3648  | R.DGGS DYLGK.G                           |                  |
|             |                                |                                         |                            |                                                                           |                                                   |                                |              |              |     |       |       | 787.3738 | 1572.7330 | K.VNQIGSVTESIEAVK.M                      |                  |
|             |                                |                                         |                            |                                                                           |                                                   |                                |              |              |     |       |       | 914.3973 | 1826.7800 | R.IEEELGSEAVYAGASFR.K                    |                  |
| gi 114421   | ATP synthase (F1) subunit beta | <i>Nicotiana glauca</i> plumbaginifolia | Mitochondria               |                                                                           | 07.22-Transporters/Transport ATPases              | N                              | 5.95 / 59819 | 8            | 142 | 59819 | 0.13  | 488.2625 | 974.5104  | K.IGLFGGAGVGK.T                          |                  |
|             |                                |                                         |                            |                                                                           |                                                   |                                |              |              |     |       |       | 587.3066 | 1172.5986 | K.VVDLLAPYQR.G                           |                  |
|             |                                |                                         |                            |                                                                           |                                                   |                                |              |              |     |       |       | 639.7943 | 1277.5740 | R.TIAMDGTEGLVR.G + Oxidation (M)         |                  |
|             |                                |                                         |                            |                                                                           |                                                   |                                |              |              |     |       |       | 705.3753 | 1408.7360 | R.VLNTGSPITVPVGR.A                       |                  |
| gi 15984    | Actinidin                      | <i>Actinidia deliciosa</i>              | Unclear                    | 100% to gi 193806686 <i>Actinidia chinensis</i>                           | 06.13-Protein destination and storage/Proteolysis | N                              | 4.91 / 42131 | 7            | 135 | 42131 | 0.19  | 430.2292 | 858.4438  | R.SAGAVVDIK.S                            |                  |

|              |                          |                             |                            |                                                                                   |                                              |   |              |    |     |       |          |           |                                                              |                                          |
|--------------|--------------------------|-----------------------------|----------------------------|-----------------------------------------------------------------------------------|----------------------------------------------|---|--------------|----|-----|-------|----------|-----------|--------------------------------------------------------------|------------------------------------------|
|              |                          |                             |                            | <i>deliciosa</i> , E value: 0.0                                                   |                                              |   |              |    |     |       | 948.4097 | 1894.8048 | R.NVGGAGTCGIATMPSYPVK.Y + Carbamidomethyl (C); Oxidation (M) |                                          |
| gi 225465417 | Agglutinin               | <i>Vitis vinifera</i>       | Cytosol                    | 99% to gi 57233444 <i>Triticum aestivum</i> , E value: 8e-107                     | 03.26-Cell growth/division/Growth regulators | N | 6.71 / 52943 | 5  | 104 | 52943 | 0.15     | 507.2548  | 1012.4950                                                    | R.VDKNVVALR.N                            |
|              |                          |                             |                            |                                                                                   |                                              |   |              |    |     |       |          | 520.2427  | 1038.4708                                                    | R.NIYNVNFR.L                             |
|              |                          |                             |                            |                                                                                   |                                              |   |              |    |     |       |          | 533.7222  | 1065.4298                                                    | K.GDNGNYLSAR.T                           |
| 10           | gi 160419153             | Pectinesterase              | <i>Actinidia deliciosa</i> | Apoplast                                                                          |                                              |   |              |    |     |       |          |           |                                                              |                                          |
|              |                          |                             |                            |                                                                                   | 09.01-Cell structure/Cell wall               | N | 6.67 / 35346 | 24 | 596 | 35346 | 1.03     | 635.2853  | 1268.5560                                                    | R.GISFENYAGPSK.H                         |
|              |                          |                             |                            |                                                                                   |                                              |   |              |    |     |       |          | 641.2973  | 1280.5800                                                    | K.TNLMFIGDGIGK.T + Oxidation (M)         |
|              |                          |                             |                            |                                                                                   |                                              |   |              |    |     |       |          | 682.8495  | 1363.6844                                                    | R.SSTVAVVGTGFIAR.G                       |
|              |                          |                             |                            |                                                                                   |                                              |   |              |    |     |       |          | 717.8038  | 1433.5930                                                    | K.EGAYFEYVDVVK.K                         |
|              |                          |                             |                            |                                                                                   |                                              |   |              |    |     |       |          | 751.3996  | 1500.7846                                                    | K.VAAAADLIPVLSSEFK.T                     |
|              |                          |                             |                            |                                                                                   |                                              |   |              |    |     |       |          | 844.8546  | 1687.6946                                                    | R.DDPNQNTGISLNCK.V + Carbamidomethyl (C) |
| gi 119354    | Enolase                  | <i>Solanum lycopersicum</i> | Cytosol                    |                                                                                   | 02.01-Energy/Glycolysis                      | N | 5.68 / 47768 | 18 | 418 | 47768 | 0.46     | 456.1935  | 910.3724                                                     | R.DGGS DYLGK.G                           |
|              |                          |                             |                            |                                                                                   |                                              |   |              |    |     |       |          | 787.3868  | 1572.7590                                                    | K.VNQIGSVTESIEAVK.M                      |
|              |                          |                             |                            |                                                                                   |                                              |   |              |    |     |       |          | 902.9301  | 1803.8456                                                    | R.AAVPSGASTGIYEALR.D                     |
|              |                          |                             |                            |                                                                                   |                                              |   |              |    |     |       |          | 914.3930  | 1826.7714                                                    | R.IEEELGSEAVYAGASFR.K                    |
|              |                          |                             |                            |                                                                                   |                                              |   |              |    |     |       |          | 1162.4757 | 2322.9368                                                    | K.YGQDATNVGDEGGFAPNIQENK.E               |
| gi 6723469   | Glutathione reductase    | <i>Betula pendula</i>       | Chloroplast                |                                                                                   | 11.06-Disease/Defence/Detoxification         | N | 5.98 / 38913 | 7  | 108 | 38913 | 0.20     | 650.3249  | 1298.6352                                                    | R.LNLEAVGVLDK.T                          |
|              |                          |                             |                            |                                                                                   |                                              |   |              |    |     |       |          | 849.9080  | 1697.8014                                                    | K.IVGPNEVEVTQLDGTK.L                     |
| gi 224074105 | Alanine aminotransferase | <i>Populus trichocarpa</i>  | Mitochondria               | 99% to gi 297839097 <i>Arabidopsis lyrata</i> subsp. <i>lyrata</i> , E value: 0.0 | 01.01-Metabolism/Amino acid                  | N | 5.27 / 52650 | 3  | 78  | 52650 | 0.07     | 466.2394  | 930.4642                                                     | K.DGILSSLAR.R                            |
|              |                          |                             |                            |                                                                                   |                                              |   |              |    |     |       |          | 508.7481  | 1015.4816                                                    | R.DTIAAGIEAR.D                           |

|    |              |                             |                             |          |                                                                 |                                       |   |              |    |     |       |      |           |           |                                      |
|----|--------------|-----------------------------|-----------------------------|----------|-----------------------------------------------------------------|---------------------------------------|---|--------------|----|-----|-------|------|-----------|-----------|--------------------------------------|
|    | gi 165960245 | Endo-beta-1,4-glucanase     | <i>Persea americana</i>     | Apoplast | 78% to gi 22208353 <i>Fragaria x ananassa</i> . E value: 2e-111 | 09.01-Cell structure/Cell wall        | N | 9.10 / 26600 | 8  | 120 | 26600 | 0.31 | 528.7289  | 1055.4432 | K.VDSSFVSCR.G + Carbamidomethyl (C)  |
|    |              |                             |                             |          |                                                                 |                                       |   |              |    |     |       |      | 688.8119  | 1375.6092 | K.SQVDYILGDNPR.A                     |
| 11 | gi 15218869  | Isocitrate dehydrogenase    | <i>Arabidopsis thaliana</i> | Cytosol  |                                                                 | 02.10-Energy/TCA pathway              | N | 6.13 / 45717 | 5  | 89  | 45717 | 0.14 | 528.7632  | 1055.5118 | R.ATDAVIKGP GK.L                     |
|    |              |                             |                             |          |                                                                 |                                       |   |              |    |     |       |      | 560.2580  | 1118.5014 | K.CATITPDEGR.V + Carbamidomethyl (C) |
|    | gi 22007862  | Enolase                     | <i>Vitis vinifera</i>       | Cytosol  | 86% to gi 225455555 <i>Vitis vinifera</i> . E value: 9e-80      | 02.01-Energy/Glycolysis               | N | 9.14 / 30878 | 16 | 254 | 30878 | 0.41 | 754.3586  | 1506.7026 | R.IEEELGSAAVYAGAK.F                  |
|    |              |                             |                             |          |                                                                 |                                       |   |              |    |     |       |      | 755.8969  | 1509.7792 | K.VQIVGDDLLVTNPK.R                   |
|    |              |                             |                             |          |                                                                 |                                       |   |              |    |     |       |      | 787.3854  | 1572.7562 | K.VNQIGSVTESIEAVK.M                  |
| 12 | gi 22007862  | Enolase                     | <i>Vitis vinifera</i>       | Cytosol  | 86% to gi 225455555 <i>Vitis vinifera</i> . E value: 9e-80      | 02.01-Energy/Glycolysis               | N | 9.14 / 30878 | 16 | 176 | 30878 | 0.26 | 754.3529  | 1506.6912 | R.IEEELGSAAVYAGAK.F                  |
|    |              |                             |                             |          |                                                                 |                                       |   |              |    |     |       |      | 755.8944  | 1509.7742 | K.VQIVGDDLLVTNPK.R                   |
|    |              |                             |                             |          |                                                                 |                                       |   |              |    |     |       |      | 787.3898  | 1572.7650 | K.VNQIGSVTESIEAVK.M                  |
| 13 | gi 225455555 | Enolase                     | <i>Vitis vinifera</i>       | Cytosol  | 100% to gi 255539693 <i>Ricinus communis</i> . E value: 0.0     | 02.01-Energy/Glycolysis               | N | 6.17 / 48080 | 16 | 336 | 48080 | 0.34 | 451.7304  | 901.4462  | K.ACNAALLK.V + Carbamidomethyl (C)   |
|    |              |                             |                             |          |                                                                 |                                       |   |              |    |     |       |      | 754.3381  | 1506.6616 | R.IEEELGSAAVYAGAK.F                  |
|    |              |                             |                             |          |                                                                 |                                       |   |              |    |     |       |      | 755.8606  | 1509.7066 | K.VQIVGDDLLVTNPK.R                   |
|    |              |                             |                             |          |                                                                 |                                       |   |              |    |     |       |      | 787.3634  | 1572.7122 | K.VNQIGSVTESIEAVK.M                  |
|    |              |                             |                             |          |                                                                 |                                       |   |              |    |     |       |      | 1162.4537 | 2322.8928 | K.YGQDATNVGDEGGFAPNI QENK.E          |
|    | gi 2078350   | Transaldolase               | <i>Solanum tuberosum</i>    | Unclear  |                                                                 | 02.07-Energy/Pentose phosphate        | N | 5.79 / 47779 | 10 | 270 | 47779 | 0.35 | 542.7658  | 1083.5170 | K.IGTPEALDLR.G                       |
|    |              |                             |                             |          |                                                                 |                                       |   |              |    |     |       |      | 600.2894  | 1198.5642 | R.VTSVASFFVSR.V                      |
|    |              |                             |                             |          |                                                                 |                                       |   |              |    |     |       |      | 660.3091  | 1318.6036 | R.LADDTEGTVEAAK.W                    |
|    |              |                             |                             |          |                                                                 |                                       |   |              |    |     |       |      | 691.3074  | 1380.6002 | K.SFDSLDSLQEK.A                      |
|    | gi 1143381   | Polygalacturonase inhibitor | <i>Actinidia deliciosa</i>  | Apoplast |                                                                 | 11.02-Disease/defense/Defense-related | N | 8.72 / 36141 | 13 | 185 | 36141 | 0.35 | 442.6992  | 883.3838  | K.FQFDLSK.V                          |
|    |              |                             |                             |          |                                                                 |                                       |   |              |    |     |       |      | 539.7690  | 1077.5234 | K.TIQIVDFSR.N                        |
|    |              |                             |                             |          |                                                                 |                                       |   |              |    |     |       |      | 574.3029  | 1146.5912 | K.IYGSLPVGLTK.L                      |

|    |              |                         |                                      |              |                                                                                                                                    |   |              |    |     |       |      |           |           |                                        |
|----|--------------|-------------------------|--------------------------------------|--------------|------------------------------------------------------------------------------------------------------------------------------------|---|--------------|----|-----|-------|------|-----------|-----------|----------------------------------------|
|    | gi 225430200 | Hypothetical protein    | <i>Vitis vinifera</i>                | Unclear      | 30-Unknown                                                                                                                         | N | 5.77 / 40308 | 9  | 133 | 40308 | 0.09 | 604.6218  | 1810.8436 | K.VVFPQSLTSLDLNHNK.I                   |
|    |              |                         |                                      |              |                                                                                                                                    |   |              |    |     |       |      | 416.2051  | 830.3956  | R.LGNEASIK.Q                           |
|    |              |                         |                                      |              |                                                                                                                                    |   |              |    |     |       |      | 590.2793  | 1178.5440 | R.DTIKVPYESK.G                         |
|    | gi 149938958 | Glutamate dehydrogenase | <i>Actinidia chinensis</i>           | Mitochondria | 01.01-Metabolism/Amino acid                                                                                                        | N | 6.28 / 44801 | 5  | 105 | 44801 | 0.17 | 859.3913  | 1716.7680 | K.QGDMLLVVPEGAF AVR.L + Oxidation (M)  |
|    |              |                         |                                      |              |                                                                                                                                    |   |              |    |     |       |      | 579.7951  | 1157.5756 | K.VVAVSDITGAVK.N                       |
|    |              |                         |                                      |              |                                                                                                                                    |   |              |    |     |       |      | 581.7750  | 1161.5354 | K.TAVADIPYGGAK.G                       |
|    | gi 15239438  | Hypothetical protein    | <i>Arabidopsis thaliana</i>          | Unclear      | 30-Unknown                                                                                                                         | N | 6.92 / 39953 | 7  | 104 | 39953 | NA   | 400.7224  | 799.4302  | R.AIELVAGKE                            |
|    |              |                         |                                      |              |                                                                                                                                    |   |              |    |     |       |      | 416.2051  | 830.3956  | R.LGNEASIK.Q                           |
|    |              |                         |                                      |              |                                                                                                                                    |   |              |    |     |       |      | 590.2793  | 1178.5440 | K.DTLKVPYESK.G                         |
|    | gi 119023806 | HSP 70 dnaK protein     | <i>Selaginella lepidophylla</i>      | Unclear      | 84% to gi 118366049 <i>Tetrahymena thermophila</i> . E value: 4e-97<br>06.01-Protein destination and storage/Folding and stability | N | 8.84 / 24806 | 17 | 145 |       | 0.30 | 614.7817  | 1227.5488 | R.VEIIANDQG NR.T                       |
|    |              |                         |                                      |              |                                                                                                                                    |   |              |    |     |       |      | 737.3068  | 1472.5990 | R.TTPSYVGF TESER.L                     |
|    |              |                         |                                      |              |                                                                                                                                    |   |              |    |     |       |      | 841.3628  | 1680.7110 | K.DAVVTVPAYFNDSQR.Q                    |
| 14 | gi 225430200 | Hypothetical protein    | <i>Vitis vinifera</i>                | Unclear      | 30-Unknown                                                                                                                         | N | 5.77 / 40308 | 9  | 163 | 40308 | 0.13 | 416.2136  | 830.4126  | R.LGNEASIK.Q                           |
|    |              |                         |                                      |              |                                                                                                                                    |   |              |    |     |       |      | 590.2910  | 1178.5674 | R.DTIKVPYESK.G                         |
|    |              |                         |                                      |              |                                                                                                                                    |   |              |    |     |       |      | 859.3954  | 1716.7762 | K.QGDMLLVVPEGAF AVR.L + Oxidation (M)  |
|    | gi 2078350   | Transaldolase           | <i>Solanum tuberosum</i>             | Unclear      | 02.07-Energy/Pentose phosphate                                                                                                     | N | 5.79 / 47779 | 4  | 105 | 47779 | 0.16 | 542.7762  | 1083.5378 | K.IGTPEALDLR.G                         |
|    |              |                         |                                      |              |                                                                                                                                    |   |              |    |     |       |      | 600.3019  | 1198.5892 | R.VTSVASFFVSR.V                        |
|    | gi 126896    | Malate dehydrogenase    | <i>Citrullus lanatus</i>             | Mitochondria | 02.10-Energy/TCA pathway                                                                                                           | N | 8.88 / 36178 | 6  | 95  | 36178 | 0.22 | 617.2701  | 1232.5256 | R.TQDGGTEVVEAK.A                       |
|    |              |                         |                                      |              |                                                                                                                                    |   |              |    |     |       |      | 659.8250  | 1317.6354 | R.DDLFNINAGIVK.S                       |
|    | gi 146216004 | Cysteine protease       | <i>Actinidia deliciosa</i>           | Unclear      | 06.13-Protein destination and storage/Proteolysis                                                                                  | N | 4.90 / 50759 | 6  | 81  | 50759 | 0.07 | 667.3204  | 1332.6262 | K.CGIAVEPSYPIK.T + Carbamidomethyl (C) |
|    |              |                         |                                      |              |                                                                                                                                    |   |              |    |     |       |      | 1145.0130 | 2288.0114 | K.VVTIDDYEDVPV NNEQALC K.A             |
|    | gi 26563946  | Alpha-galactosidase     | <i>Mesembryanthemum crystallinum</i> | Apoplast     | 83% to gi 224113219 <i>Populus trichocarpa</i> . E value: 6e-119<br>01.05-Metabolism/Sugars and polysaccharides                    | N | 4.96 / 26451 | 10 | 117 | 26451 | 0.14 | 557.2816  | 1112.5486 | K.APLLIGCDVR.N + Carbamidomethyl (C)   |
|    |              |                         |                                      |              |                                                                                                                                    |   |              |    |     |       |      | 797.8928  | 1593.7710 | K.EVIAVNQDPLGIQAK.K                    |



|    |              |                                          |                                        |              |                                                                         |                                   |   |               |    |     |       |      |           |           |                                              |
|----|--------------|------------------------------------------|----------------------------------------|--------------|-------------------------------------------------------------------------|-----------------------------------|---|---------------|----|-----|-------|------|-----------|-----------|----------------------------------------------|
|    | gi 117220428 | Acyl-coenzyme A oxidase                  | <i>Oryza sativa Indica Group</i>       | Peroxisome   | 98% to gi 115467984 <i>Oryza sativa Japonica Group</i> . E value: 7e-96 | 01.06-Metabolism/Lipid and sterol | N | 10.27 / 42164 | 2  | 74  | 42164 | NA   | 415.1843  | 414.1770  | K.GGGPK.K                                    |
|    |              |                                          |                                        |              |                                                                         |                                   |   |               |    |     |       |      | 421.7384  | 841.4622  | -.VATVSIPR.T                                 |
|    | gi 57570980  | Methylcrotonoyl-CoA carboxylase          | <i>Citrus trifoliata</i>               | Mitochondria | 73% to gi 224103609 <i>Populus trichocarpa</i> . E value: 8e-26         | 01.01-Metabolism/Amino acid       | N | 10.06 / 30039 | 3  | 65  |       | NA   | 428.7466  | 855.4786  | R.LASLLSPR.M                                 |
|    |              |                                          |                                        |              |                                                                         |                                   |   |               |    |     |       |      | 622.8170  | 1243.6194 | R.LTISVIDSIKR.L                              |
| 15 | gi 7798706   | Malate dehydrogenase                     | <i>Vitis vinifera</i>                  | Mitochondria |                                                                         | 02.10-Energy/TCA pathway          | N | 8.79 / 36851  | 20 | 344 | 36851 | 0.63 | 610.2931  | 1218.5716 | K.LFGVTTLDVVR.A                              |
|    |              |                                          |                                        |              |                                                                         |                                   |   |               |    |     |       |      | 617.2404  | 1232.4662 | R.TQDGGTEVVEAK.A                             |
|    |              |                                          |                                        |              |                                                                         |                                   |   |               |    |     |       |      | 659.7871  | 1317.5596 | R.DDLFNINAGIVK.S                             |
|    |              |                                          |                                        |              |                                                                         |                                   |   |               |    |     |       |      | 897.9518  | 1793.8890 | K.VAVLGAAGGIGQPLALLM<br>K.L + Oxidation (M)  |
|    |              |                                          |                                        |              |                                                                         |                                   |   |               |    |     |       |      | 909.8804  | 1817.7462 | K.NGVVEEVLGLGPLSDYEK.Q                       |
|    | gi 207667274 | Malate dehydrogenase                     | <i>Brassica rapa subsp. Pekinensis</i> | Chloroplast  |                                                                         | 02.30-Energy/Photosynthesis       | N | 8.51 / 42292  | 9  | 201 | 42292 | 0.29 | 610.2931  | 1218.5716 | K.LFGVTTLDVVR.A                              |
|    |              |                                          |                                        |              |                                                                         |                                   |   |               |    |     |       |      | 659.7871  | 1317.5596 | R.DDLFNINAGIVK.T                             |
|    |              |                                          |                                        |              |                                                                         |                                   |   |               |    |     |       |      | 742.8005  | 1483.5864 | K.AGAGSATLSMAYAAAR.F<br>+ Oxidation (M)      |
|    | gi 255553512 | Hypothetical protein                     | <i>Ricinus communis</i>                | Unclear      |                                                                         | 30-Unknown                        | N | 8.88 / 39587  | 6  | 153 | 39587 | 0.20 | 500.7346  | 999.4546  | R.ESAIQILR.T                                 |
|    |              |                                          |                                        |              |                                                                         |                                   |   |               |    |     |       |      | 895.8638  | 1789.7130 | R.IDDFGSLCGPVLQVR.V +<br>Carbamidomethyl (C) |
|    | gi 115469420 | Glyceraldehyde-3-phosphate dehydrogenase | <i>Oryza sativa Japonica Group</i>     | Chloroplast  |                                                                         | 02.30-Energy/Photosynthesis       | N | 8.78 / 43467  | 6  | 85  |       | NA   | 406.1609  | 810.3072  | K.LTGMAFR.V + Oxidation<br>(M)               |
|    |              |                                          |                                        |              |                                                                         |                                   |   |               |    |     |       |      | 1093.4230 | 2184.8314 | K.GILGYTDEDVVSNDFIGDT<br>R.S                 |
|    |              |                                          |                                        |              |                                                                         |                                   |   |               |    |     |       |      | 533.6902  | 1065.3658 | K.GDNGNYLSAR.T                               |
|    | gi 51112804  | Fructose-bisphosphate aldolase           | <i>Antirrhinum majus</i>               | Cytosol      | 91% to gi 10800924 <i>Persea americana</i> . E value: 1e-131            | 02.01-Energy/Glycolysis           | N | 5.03 / 27405  | 9  | 152 | 27405 | 0.30 | 666.7944  | 1331.5742 | K.VAPEVVAEYTVR.A                             |
|    |              |                                          |                                        |              |                                                                         |                                   |   |               |    |     |       |      | 730.8029  | 1459.5912 | R.LSSINVENVESNR.R                            |
|    | gi 5443161   | Malate dehydrogenase                     | <i>Mesembryanthemum crystallinum</i>   | Glyoxysomal  | 84% to gi 297739396 <i>Vitis vinifera</i> . E value: 6e-90              | 02.10-Energy/TCA pathway          | N | 9.35 / 35743  | 8  | 136 | 35743 | 0.21 | 659.7871  | 1317.5596 | R.DDLFNINAGIVK.T                             |
|    |              |                                          |                                        |              |                                                                         |                                   |   |               |    |     |       |      | 742.8005  | 1483.5864 | -.AGAGSATLSMAYAAVK.L +<br>Oxidation (M)      |

|    |              |                                |                                         |              |                                                                          |                                      |   |               |    |     |       |      |          |           |                                          |
|----|--------------|--------------------------------|-----------------------------------------|--------------|--------------------------------------------------------------------------|--------------------------------------|---|---------------|----|-----|-------|------|----------|-----------|------------------------------------------|
|    | gi 124671212 | Peroxidase                     | <i>Centaurea solstitialis</i>           | Apoplast     | 80% to gi 225451467 <i>Vitis vinifera</i> . E value: 5e-100              | 11.06-Disease/Defence/Detoxification | N | 5.15 / 28262  | 11 | 133 | 28262 | 0.29 | 741.8296 | 1481.6446 | K.FSQTFHTTIPATLR.L                       |
|    |              |                                |                                         |              |                                                                          |                                      |   |               |    |     |       |      | 939.8761 | 1877.7376 | K.DAQDNLSLAGDGFDTVIK.                    |
|    | gi 143562221 | Acyl-coenzyme A oxidase        | <i>Triticum aestivum</i>                | Peroxisome   | 92% to gi 125597167 <i>Oryza sativa Japonica Group</i> . E value: 8e-127 | 01.06-Metabolism/Lipid and sterol    | N | 11.20 / 24502 | 3  | 77  | 24502 | NA   | 421.7087 | 841.4028  | -.VATVSIPR.T                             |
|    |              |                                |                                         |              |                                                                          |                                      |   |               |    |     |       |      | 689.2930 | 1376.5714 | K.VLKCCYLIPV.- + 2 Carbamidomethyl (C)   |
| 16 | gi 7798706   | Malate dehydrogenase           | <i>Vitis vinifera</i>                   | Mitochondria |                                                                          | 02.10-Energy/TCA pathway             | N | 8.79 / 36851  | 20 | 354 | 36851 | 0.63 | 610.2908 | 1218.5670 | K.LFGVTTLDVVVR.A                         |
|    |              |                                |                                         |              |                                                                          |                                      |   |               |    |     |       |      | 617.2405 | 1232.4664 | R.TQDGGTEVVEAK.A                         |
|    |              |                                |                                         |              |                                                                          |                                      |   |               |    |     |       |      | 659.7856 | 1317.5566 | R.DDLFNINAGIVK.S                         |
|    |              |                                |                                         |              |                                                                          |                                      |   |               |    |     |       |      | 897.9502 | 1793.8858 | K.VAVLGAAGGIGQPLALLM K.L + Oxidation (M) |
|    |              |                                |                                         |              |                                                                          |                                      |   |               |    |     |       |      | 909.8799 | 1817.7452 | K.NGVVEEVLGLGPLSDYEK.Q                   |
|    | gi 255575381 | Fructose-bisphosphate aldolase | <i>Ricinus communis</i>                 | Cytosol      |                                                                          | 02.01-Energy/Glycolysis              | N | 6.57 / 38613  | 11 | 192 | 38613 | 0.20 | 416.1981 | 830.3816  | R.ALQASTLK.A                             |
|    |              |                                |                                         |              |                                                                          |                                      |   |               |    |     |       |      | 463.7140 | 925.4134  | K.ENGVLPGIK.V                            |
|    |              |                                |                                         |              |                                                                          |                                      |   |               |    |     |       |      | 577.7377 | 1153.4608 | K.ANSEATLGTYK.G                          |
|    |              |                                |                                         |              |                                                                          |                                      |   |               |    |     |       |      | 666.7935 | 1331.5724 | K.VAPEVVAEYTVR.A                         |
|    | gi 115473517 | Malate dehydrogenase           | <i>Oryza sativa (japonica cultivar-</i> | Glyoxysomal  |                                                                          | 02.10-Energy/TCA pathway             | N | 9.00 / 42195  | 10 | 167 | 42195 | 0.29 | 610.2908 | 1218.5670 | K.LFGVTTLDVVVR.A                         |
|    |              |                                |                                         |              |                                                                          |                                      |   |               |    |     |       |      | 629.7750 | 1257.5354 | R.IQNAGTEVVEAK.A                         |
|    |              |                                |                                         |              |                                                                          |                                      |   |               |    |     |       |      | 888.9709 | 1775.9272 | K.VAILGAAGGIGQPLSLLVK.M                  |
|    |              |                                |                                         |              |                                                                          |                                      |   |               |    |     |       |      | 533.6907 | 1065.3668 | K.GDNGNYLSAR.T                           |
|    | gi 39791702  | Hypothetical protein           | <i>Solanum tuberosum</i>                | Unclear      | 86% to gi 225450055 <i>Vitis vinifera</i> . E value: 2e-131              | 30-Unknown                           | N | 8.34 / 35244  | 9  | 188 | 35244 | 0.22 | 500.7358 | 999.4570  | R.ESALAQIIR.T                            |
|    |              |                                |                                         |              |                                                                          |                                      |   |               |    |     |       |      | 553.2103 | 1104.4060 | R.TCAQEEVLR.V + Carbamidomethyl (C)      |
|    |              |                                |                                         |              |                                                                          |                                      |   |               |    |     |       |      | 621.7668 | 1241.5190 | K.GSLYALTFGASR.T                         |
|    | gi 14493820  | Malate dehydrogenase           | <i>Beta vulgaris</i>                    | Chloroplast  | 90% to gi 225452831 <i>Vitis vinifera</i> . E value: 4e-108              | 02.30-Energy/Photosynthesis          | N | 6.14 / 23733  | 15 | 188 | 23733 | 0.56 | 610.2908 | 1218.5670 | K.LFGVTTLDVVVR.A                         |
|    |              |                                |                                         |              |                                                                          |                                      |   |               |    |     |       |      | 629.7750 | 1257.5354 | R.IQNAGTEVVEAK.A                         |

|    |              |                                          |                                    |                       |                                                             |                                                             |   |              |    |     |       |          |           |                                           |                  |
|----|--------------|------------------------------------------|------------------------------------|-----------------------|-------------------------------------------------------------|-------------------------------------------------------------|---|--------------|----|-----|-------|----------|-----------|-------------------------------------------|------------------|
|    |              |                                          |                                    |                       |                                                             |                                                             |   |              |    |     |       | 659.7856 | 1317.5566 | R.DDLFNINAGIVK.T                          |                  |
|    | gi 8122436   | Protein disulfide isomerase              | <i>Euphorbia esula</i>             | Endoplasmic reticulum | 85% to gi 224128376 <i>Populus trichocarpa</i> . E          | 06.01-Protein destination and storage/Folding and stability | N | 4.79 / 20324 | 11 | 92  | 20324 | NA       | 534.7303  | 1067.4460                                 | K.YGVSGFPTLK.F   |
|    |              |                                          |                                    |                       |                                                             |                                                             |   |              |    |     |       | 728.2872 | 1454.5598 | R.DLDDFVTFINEK.S                          |                  |
| 17 | gi 115434198 | fructose-bisphosphate aldolase           | <i>Oryza sativa Japonica Group</i> | Chloroplast           |                                                             | 02.30-Energy/Photosynthesis                                 | N | 8.81 / 41968 | 14 | 260 | 41968 | 0.41     | 436.7045  | 871.3944                                  | R.ALQNSVLK.T     |
|    |              |                                          |                                    |                       |                                                             |                                                             |   |              |    |     |       | 465.2038 | 928.3930  | K.ANSLAQLGR.Y                             |                  |
|    |              |                                          |                                    |                       |                                                             |                                                             |   |              |    |     |       | 593.1843 | 1184.3540 | R.YTGEGESDEAK.K                           |                  |
|    |              |                                          |                                    |                       |                                                             |                                                             |   |              |    |     |       | 724.7763 | 1447.5380 | R.GILAIDESNAATCGK.R + Carbamidomethyl (C) |                  |
|    |              |                                          |                                    |                       |                                                             |                                                             |   |              |    |     |       | 749.8353 | 1497.6560 | R.TVVSIPCGPSALAVK.E + Carbamidomethyl (C) |                  |
|    | gi 255575381 | Fructose-bisphosphate aldolase           | <i>Ricinus communis</i>            | Cytosol               |                                                             | 02.01-Energy/Glycolysis                                     | N | 6.57 / 38613 | 11 | 219 | 38613 | 0.20     | 416.1947  | 830.3748                                  | R.ALQASTLK.A     |
|    |              |                                          |                                    |                       |                                                             |                                                             |   |              |    |     |       | 463.7041 | 925.3936  | K.ENGVLPGIK.V                             |                  |
|    |              |                                          |                                    |                       |                                                             |                                                             |   |              |    |     |       | 577.7226 | 1153.4306 | K.ANSEATLGTYK.G                           |                  |
|    |              |                                          |                                    |                       |                                                             |                                                             |   |              |    |     |       | 666.7870 | 1331.5594 | K.VAPEVVAEYTVR.A                          |                  |
|    | gi 126896    | Malate dehydrogenase                     | <i>Citrullus lanatus</i>           | Mitochondria          |                                                             | 02.10-Energy/TCA pathway                                    | N | 8.88 / 36178 | 11 | 188 | 36178 | 0.35     | 617.2349  | 1232.4552                                 | R.TQDGGTEVVEAK.A |
|    |              |                                          |                                    |                       |                                                             |                                                             |   |              |    |     |       | 659.7799 | 1317.5452 | R.DDLFNINAGIVK.S                          |                  |
|    |              |                                          |                                    |                       |                                                             |                                                             |   |              |    |     |       | 897.9373 | 1793.8600 | K.VAVLGAAGGIGQPLALLM K.L + Oxidation (M)  |                  |
|    | gi 211906514 | Lactoylglutathione lyase                 | <i>Gossypium hirsutum</i>          | Chloroplast           |                                                             | 11.06-Disease/Defence/Detoxification                        | N | 5.69 / 32495 | 7  | 84  | 32495 | 0.25     | 639.7536  | 1277.4926                                 | K.ITSFDPDGWK.T   |
|    |              |                                          |                                    |                       |                                                             |                                                             |   |              |    |     |       | 646.7670 | 1291.5194 | K.TVLVDNEDFLK.E                           |                  |
|    | gi 39791702  | Hypothetical protein                     | <i>Solanum tuberosum</i>           | Unclear               | 86% to gi 225450055 <i>Vitis vinifera</i> . E value: 2e-131 | 30-Unknown                                                  | N | 8.34 / 35244 | 9  | 182 | 35244 | 0.36     | 500.7275  | 999.4404                                  | R.ESALAQIIR.T    |
|    |              |                                          |                                    |                       |                                                             |                                                             |   |              |    |     |       | 553.2059 | 1104.3972 | R.TCAQEEVLR.V + Carbamidomethyl (C)       |                  |
|    |              |                                          |                                    |                       |                                                             |                                                             |   |              |    |     |       | 621.7590 | 1241.5034 | K.GSLYALTFGASR.T                          |                  |
|    | gi 21093381  | Glyceraldehyde-3-phosphate dehydrogenase | <i>Gossypium arboreum</i>          | Cytosol               | 93% to gi 297738348 <i>Vitis vinifera</i> . E value: 2e-102 | 02.01-Energy/Glycolysis                                     | N | 8.82 / 24552 | 17 | 163 | 24566 | 0.33     | 400.6913  | 799.3680                                  | K.VVISAPSK.D     |
|    |              |                                          |                                    |                       |                                                             |                                                             |   |              |    |     |       | 587.7751 | 1173.5356 | K.AGIALNKNFVK.L                           |                  |

|    |              |                                 |                                   |             |                                                                  |                                             |   |              |    |     |       |          |           |                                             |                       |
|----|--------------|---------------------------------|-----------------------------------|-------------|------------------------------------------------------------------|---------------------------------------------|---|--------------|----|-----|-------|----------|-----------|---------------------------------------------|-----------------------|
|    |              |                                 |                                   |             |                                                                  |                                             |   |              |    |     |       | 717.7933 | 1433.5720 | R.AASFNIIPSSTGAAK.A                         |                       |
|    |              |                                 |                                   |             |                                                                  |                                             |   |              |    |     |       | 749.8376 | 1497.6606 | R.VPTVDVSVVDLTVR.L                          |                       |
|    | gi 77498491  | UDP-glucuronate decarboxylase   | <i>Mimulus guttatus</i>           | Chloroplast | 89% to gi 224109544 <i>Populus trichocarpa</i> . E value: 2e-73  | 01.05-Metabolism/Sugars and polysaccharides | N | 5.98 / 24658 | 17 | 145 | 24658 | 0.15     | 609.2802  | 1216.5458                                   | R.VVSNFLAQAIR.D       |
|    |              |                                 |                                   |             |                                                                  |                                             |   |              |    |     |       | 678.2720 | 1354.5294 | K.IISVENTPDDPR.Q                            |                       |
|    |              |                                 |                                   |             |                                                                  |                                             |   |              |    |     |       | 777.8266 | 1553.6386 | R.DEPLTVQLPGTQTR.S                          |                       |
| 18 | gi 255644696 | Fructose-bisphosphate aldolase  | <i>Glycine max</i>                | Chloroplast | 100% to gi 255570707 <i>Ricinus communis</i> . E value: 0.0      | 02.30-Energy/Photosynthesis                 | N | 8.73 / 42518 | 11 | 191 | 42518 | 0.40     | 408.6692  | 815.3238                                    | R.ASPETIAK.Y          |
|    |              |                                 |                                   |             |                                                                  |                                             |   |              |    |     |       | 465.1975 | 928.3804  | K.ANSLAQLGR.Y                               |                       |
|    |              |                                 |                                   |             |                                                                  |                                             |   |              |    |     |       | 724.7711 | 1447.5276 | R.GILAIDES NATCGK.R + Carbamidomethyl (C)   |                       |
|    |              |                                 |                                   |             |                                                                  |                                             |   |              |    |     |       | 749.8888 | 1497.7630 | R.TVVSIPCGPSALAVK.E + Carbamidomethyl (C)   |                       |
|    | gi 211906514 | Lactoylglutathione lyase        | <i>Gossypium hirsutum</i>         | Chloroplast |                                                                  | 11.06-Disease/Defence/Detoxification        | N | 5.69 / 32495 | 11 | 190 | 32495 | 0.39     | 561.2452  | 1120.4758                                   | R.KPGPIPGINTK.I       |
|    |              |                                 |                                   |             |                                                                  |                                             |   |              |    |     |       | 639.7951 | 1277.5756 | K.ITSFDPDGWK.T                              |                       |
|    |              |                                 |                                   |             |                                                                  |                                             |   |              |    |     |       | 646.8068 | 1291.5990 | K.TVLVDNEDFLK.E                             |                       |
|    | gi 4650842   | Elongation factor               | <i>Lithospermum erythrorhizon</i> | Cytosol     |                                                                  | 05.04-Protein synthesis/Translation factors | N | 5.87 / 24836 | 14 | 123 | 24836 | 0.33     | 478.2025  | 954.3904                                    | R.GGGQVIPTAR.R        |
|    |              |                                 |                                   |             |                                                                  |                                             |   |              |    |     |       | 568.1896 | 1134.3646 | K.EGALAEENMR.G + Oxidation (M)              |                       |
|    |              |                                 |                                   |             |                                                                  |                                             |   |              |    |     |       | 791.8389 | 1581.6632 | K.EQMTPLSEFEDKL.- + Oxidation (M)           |                       |
|    | gi 90318896  | NADPH quinone oxidoreductase    | <i>Taraxacum officinale</i>       | Unclear     | 81% to gi 224078882 <i>Populus trichocarpa</i> . E value: 1e-110 | 02.20-Energy/Electron-transport             | N | 5.68 / 27692 | 17 | 118 | 27692 | 0.14     | 533.7004  | 1065.3862                                   | K.VFVTAGSEEK.L        |
|    |              |                                 |                                   |             |                                                                  |                                             |   |              |    |     |       | 866.4826 | 1730.9506 | K.VAVPAGQVLPISGVSLK.D                       |                       |
|    |              |                                 |                                   |             |                                                                  |                                             |   |              |    |     |       | 869.3909 | 1736.7672 | K.IGDQVCALISGGGYAEK.V + Carbamidomethyl (C) |                       |
| 19 | gi 950299    | Xyloglucan endotransglycosylase | <i>Actinidia deliciosa</i>        | Apoplast    |                                                                  | 09.01-Cell structure/Cell wall              | N | 8.49 / 34127 | 5  | 64  | 34127 | 0.11     | 862.4113  | 1722.8080                                   | _R.TGQPYILQTNVFTGGK.G |
|    | gi 255575381 | Fructose-bisphosphate aldolase  | <i>Ricinus communis</i>           | Cytosol     |                                                                  | 02.01-Energy/Glycolysis                     | N | 6.57 / 38613 | 11 | 207 | 38613 | 0.20     | 416.2314  | 830.4482                                    | R.ALQASTLK.A          |
|    |              |                                 |                                   |             |                                                                  |                                             |   |              |    |     |       | 463.7449 | 925.4752  | K.ENGVLPGIK.V                               |                       |
|    |              |                                 |                                   |             |                                                                  |                                             |   |              |    |     |       | 577.7609 | 1153.5072 | K.ANSEATLGTYK.G                             |                       |

|    |              |                              |                             |                                                               |                                                   |   |              |    |      |        |      |           |           |                                                     |
|----|--------------|------------------------------|-----------------------------|---------------------------------------------------------------|---------------------------------------------------|---|--------------|----|------|--------|------|-----------|-----------|-----------------------------------------------------|
|    | gi 211906514 | Lactoylglutathione lyase     | <i>Gossypium hirsutum</i>   | Chloroplast                                                   | 11.06-Disease/Defence/Detoxification              | N | 5.69 / 32495 | 11 | 113  | 32495  | 0.16 | 666.8210  | 1331.6274 | K.VAPEVVAEYTVR.A                                    |
|    |              |                              |                             |                                                               |                                                   |   |              |    |      |        |      | 639.7886  | 1277.5626 | K.ITSFLDPDGWK.T                                     |
|    |              |                              |                             |                                                               |                                                   |   |              |    |      |        |      | 646.8093  | 1291.6040 | K.TVLVDNEDFLK.E                                     |
|    |              |                              |                             |                                                               |                                                   |   |              |    |      |        |      | 733.3429  | 1464.6712 | K.DPDGYIFELIQR.A                                    |
|    | gi 240255920 | Beta-1.3-glucanase           | <i>Arabidopsis thaliana</i> | Vacuole                                                       | 03.26-Cell growth/division/Growth regulators      | N | 6.43 / 37688 | 6  | 75   | 37688  | 0.10 | 542.2597  | 1082.5048 | K.NFGLFFPNK.Q                                       |
|    |              |                              |                             |                                                               |                                                   |   |              |    |      |        |      | 729.8462  | 1457.6778 | R.LYDPNQAALNALR.N                                   |
| 20 | gi 255575381 | Fructose-bisphosphate        | <i>Ricinus communis</i>     | Cytosol                                                       | 02.01-Energy/Glycolysis                           | N | 6.57 / 38613 | 8  | 115  | 38613  | 0.10 | 416.2275  | 830.4404  | R.ALQASTLK.A                                        |
|    |              |                              |                             |                                                               |                                                   |   |              |    |      |        |      | 463.7406  | 925.4666  | K.ENGVLPGIK.V                                       |
|    |              |                              |                             |                                                               |                                                   |   |              |    |      |        |      | 666.8163  | 1331.6180 | K.VAPEVVAEYTVR.A                                    |
|    | gi 118488420 | ATP synthase subunit E       | <i>Populus trichocarpa</i>  | Vacuole                                                       | 07.22-Transporters/Transport ATPases              | N | 7.79 / 26366 | 10 | 112  | 26366  | 0.31 | 582.2663  | 1162.5180 | K.IVFENSLDAR.L                                      |
|    |              |                              |                             | 99% to gi 255537687 <i>Ricinus communis</i> , E value: 2e-109 |                                                   |   |              |    |      |        |      | 731.8237  | 1461.6328 | K.VLQAQDDVVNSMK.D + Oxidation (M)                   |
| 21 | gi 157829826 | Actinidin chain A            | <i>Actinidia deliciosa</i>  | Unclear                                                       | 06.13-Protein destination and storage/Proteolysis | N | 4.23 / 23543 | 41 | 4137 | 235463 | 3.49 | 430.2256  | 858.4366  | R.SAGAVVDIK.S                                       |
|    |              |                              |                             |                                                               |                                                   |   |              |    |      |        |      | 518.2269  | 1034.4392 | -.LPSYVDWR.S                                        |
|    |              |                              |                             |                                                               |                                                   |   |              |    |      |        |      | 866.3238  | 1730.6330 | K.NSWDTTWGEEGYMR.I                                  |
|    |              |                              |                             |                                                               |                                                   |   |              |    |      |        |      | 948.3859  | 1894.7572 | R.NVGGAGTCGIATMPSYPVK                               |
|    |              |                              |                             |                                                               |                                                   |   |              |    |      |        |      | 1051.5106 | 2101.0066 | K.IVTGVLISLSEQELIDCGR.T + Carbamidomethyl (C)       |
|    |              |                              |                             |                                                               |                                                   |   |              |    |      |        |      | 1171.4719 | 2340.9292 | K.SQGECCGCWAFSAIATVEG INK.I + 2 Carbamidomethyl (C) |
|    | gi 157834287 | Chymopapain                  | <i>Carica papaya</i>        | Apoplast                                                      | 06.13-Protein destination and storage/Proteolysis | N | 9.37 / 23658 | 10 | 95   | 23658  | 0.82 | 1125.9779 | 2249.9412 | K.NQGACGSPWAFSTIATVEG INK.I                         |
|    |              |                              |                             |                                                               |                                                   |   |              |    |      |        |      | 1171.4672 | 2340.9198 | K.NQGACGSMWAFSTIATVEG INK.I + Carbamidomethyl (C)   |
|    |              |                              |                             |                                                               |                                                   |   |              |    |      |        |      | 1174.4711 | 2346.9276 | K.NQGACGSHWAFSTIATVEG INK.I + Carbamidomethyl (C)   |
| 22 | gi 1170601   | Fruit protein oxidoreductase | <i>Actinidia deliciosa</i>  | Chloroplast                                                   | 02.20-Energy/Electron-transport                   | N | 7.88 / 35177 | 16 | 279  | 35177  | 0.50 | 573.3096  | 1144.6046 | R.VLPAAAESLFK.V                                     |
|    |              |                              |                             |                                                               |                                                   |   |              |    |      |        |      | 707.8539  | 1413.6932 | K.EGDVVDLTQIIGR.G                                   |
|    |              |                              |                             |                                                               |                                                   |   |              |    |      |        |      | 739.3560  | 1476.6974 | R.SVPGTTSEVLCSLK.E + Carbamidomethyl (C)            |

|    |              |                              |                             |             |                                                                 |                                       |    |                 |    |      |       |          |           |                                              |                                        |
|----|--------------|------------------------------|-----------------------------|-------------|-----------------------------------------------------------------|---------------------------------------|----|-----------------|----|------|-------|----------|-----------|----------------------------------------------|----------------------------------------|
|    |              |                              |                             |             |                                                                 |                                       |    |                 |    |      |       | 788.3823 | 1574.7500 | R.QDTYIWTPVPISR.V                            |                                        |
|    | gi 147784332 | Triosephosphate isomerase    | <i>Vitis vinifera</i>       | Cytosol     | 99% to gi 211906460 <i>Gossypium hirsutum</i> , E value: 2e-127 | 02.01-Energy/Glycolysis               | N  | 6.34 / 27181    | 15 | 265  | 27181 | 0.48     | 663.3062  | 1324.5978                                    | R.IYGGSVSGANCK.E + Carbamidomethyl (C) |
|    |              |                              |                             |             |                                                                 |                                       |    |                 |    |      |       | 687.8286 | 1373.6426 | K.VIACVGETLEQR.E + Carbamidomethyl (C)       |                                        |
|    |              |                              |                             |             |                                                                 |                                       |    |                 |    |      |       | 727.3199 | 1452.6252 | R.ESGSTMEVVAAQTK.A + Oxidation (M)           |                                        |
|    | gi 117697496 | Serine-rich protein          | <i>Solanum lycopersicum</i> | Unclear     | 68% to gi 225430428 <i>Vitis vinifera</i> , E value: 3e-62      | 30-Unknown                            | N  | 5.53 / 25422    | 3  | 102  | 25422 | 0.15     | 413.7432  | 825.4718                                     | K.ITNLLPR.K                            |
|    |              |                              |                             |             |                                                                 |                                       |    |                 |    |      |       | 543.2819 | 1084.5492 | -.MKITNLLPR.K                                |                                        |
| 23 | gi 1170601   | Fruit protein oxidoreductase | <i>Actinidia deliciosa</i>  | Chloroplast |                                                                 | 02.20-Energy/Electron-transport       | CC | 7.88 / 35177    | 7  | 122  | 35177 | 0.23     | 573.3104  | 1144.6062                                    | R.VLPAAAESLFK.V                        |
|    |              |                              |                             |             |                                                                 |                                       |    |                 |    |      |       | 707.8557 | 1413.6968 | K.EGDVVDLTQIIGR.G                            |                                        |
|    | gi 92012845  | Triosephosphate isomerase    | <i>Nicotiana tabacum</i>    | Cytosol     | 97% to gi 76573375 <i>Solanum tuberosum</i> , E value: 1e-69    | 02.01-Energy/Glycolysis               | CC | 8.96 / 32564    | 8  | 100  | 32564 | 0.12     | 687.8314  | 1373.6482                                    | K.VIACVGETLEQR.E + Carbamidomethyl (C) |
|    |              |                              |                             |             |                                                                 |                                       |    |                 |    |      |       | 732.3444 | 1462.6742 | R.LLLNESNDFVGDK.V                            |                                        |
| 24 | gi 85701136  | Kiwellin                     | <i>Actinidia deliciosa</i>  | Apoplast    |                                                                 | 11.02-Disease/defense/Defense-related | CC | 5.83 / 19955.09 | 60 | 1934 | 19955 | 5.93     | 490.1845  | 978.3544                                     | K.VVDECDSR.H + Carbamidomethyl (C)     |
|    |              |                              |                             |             |                                                                 |                                       |    |                 |    |      |       | 525.6896 | 1049.3646 | -.ISSCNGPCR.D + 2 Carbamidomethyl (C)        |                                        |
|    |              |                              |                             |             |                                                                 |                                       |    |                 |    |      |       | 526.1998 | 1050.3850 | K.EHAGQPPCR.N + Carbamidomethyl (C)          |                                        |
|    |              |                              |                             |             |                                                                 |                                       |    |                 |    |      |       | 654.2804 | 1306.5462 | K.NVGVDITWSMA.- + Oxidation (M)              |                                        |
|    |              |                              |                             |             |                                                                 |                                       |    |                 |    |      |       | 740.7917 | 1479.5688 | R.IVALSTGWYNGGSR.C                           |                                        |
|    |              |                              |                             |             |                                                                 |                                       |    |                 |    |      |       | 782.3186 | 1562.6226 | R.DLNDCDGQLCIK.G + 2 Carbamidomethyl (C)     |                                        |
|    |              |                              |                             |             |                                                                 |                                       |    |                 |    |      |       | 786.3009 | 1570.5872 | K.CNDDPQVGTHICR.G + 2 Carbamidomethyl (C)    |                                        |
|    |              |                              |                             |             |                                                                 |                                       |    |                 |    |      |       | 936.9018 | 1871.7890 | R.NNIVDGSNAVWSALGLDK.                        |                                        |
|    |              |                              |                             |             |                                                                 |                                       |    |                 |    |      |       | 979.3901 | 1956.7656 | K.SYPTYDCSPPVTSSTPAK.L + Carbamidomethyl (C) |                                        |
|    |              |                              |                             |             |                                                                 |                                       |    |                 |    |      |       | 435.7298 | 869.4450  | R.VVEALSPR.-                                 |                                        |
|    | gi 9456010   | Alpha-expansin               | <i>Solanum lycopersicum</i> | Apoplast    | 98% to gi 3747132 <i>Solanum lycopersicum</i> , E value: 4e-59  | 09.01-Cell structure/Cell wall        | CC | 8.12 / 17728    | 6  | 102  | 17728 | 0.22     | 473.2467  | 944.4788                                     | K.AGIVPVSFRK                           |
|    |              |                              |                             |             |                                                                 |                                       |    |                 |    |      |       | 537.2581 | 1072.5016 | K.AGIVPVSFRK.V                               |                                        |

|    |              |                                     |                            |             |                                                               |                                                             |    |              |    |      |       |      |           |           |                                            |
|----|--------------|-------------------------------------|----------------------------|-------------|---------------------------------------------------------------|-------------------------------------------------------------|----|--------------|----|------|-------|------|-----------|-----------|--------------------------------------------|
| 25 | gi 190358875 | Thaumatococin                       | <i>Actinidia deliciosa</i> | Apoplast    |                                                               | 11.02-Disease/defense/Defense-related                       | CC | 8.29 / 24205 | 41 | 2190 | 24205 | 2.22 | 527.7004  | 1053.3862 | R.TGCNFDGAGR.G + Carbamidomethyl (C)       |
|    |              |                                     |                            |             |                                                               |                                                             |    |              |    |      |       |      | 550.7059  | 1099.3972 | R.CPDAYSYPK.D + Carbamidomethyl (C)        |
|    |              |                                     |                            |             |                                                               |                                                             |    |              |    |      |       |      | 678.3804  | 1354.7462 | R.GQNWIINPGAGTK.G                          |
|    |              |                                     |                            |             |                                                               |                                                             |    |              |    |      |       |      | 711.2686  | 1420.5226 | R.APGGCNNPCTVFK.T + 2 Carbamidomethyl (C)  |
|    |              |                                     |                            |             |                                                               |                                                             |    |              |    |      |       |      | 824.3268  | 1646.6390 | K.CTADINGQCPNELR.A + 2 Carbamidomethyl (C) |
|    |              |                                     |                            |             |                                                               |                                                             |    |              |    |      |       |      | 903.2992  | 1804.5838 | K.DDQTSTFTCPAGTNYK.V + Carbamidomethyl (C) |
|    |              |                                     |                            |             |                                                               |                                                             |    |              |    |      |       |      | 1063.3784 | 2124.7422 | K.TDQYCCNSGNCGLTNFSK.                      |
|    | gi 112949627 | Alpha-expansin                      | <i>Actinidia deliciosa</i> | Apoplast    |                                                               | 09.01-Cell structure/Cell wall                              | CC | 9.89 / 22989 | 4  | 227  | 22989 | 0.17 | 473.2577  | 944.5008  | <a href="#">R.AGIVPVSR.R</a>               |
|    | gi 225444607 | Phosphoinositide 5-phosphatase      | <i>Vitis vinifera</i>      | Unclear     | 98% to gi 255550313 <i>Ricinus communis</i> , E value: 0.0    | 12-Unclear classification                                   | CC | 6.28 / 95304 | 2  | 68   |       | NA   | 518.2489  | 1034.4832 | K.LLCMVDLTK.D                              |
|    |              |                                     |                            |             |                                                               |                                                             |    |              |    |      |       |      | 637.2699  | 1272.5252 | R.INEGNRSTGGLR.F                           |
|    | gi 27248592  | 2-Cys peroxiredoxin                 | <i>Ipomoea nil</i>         | Chloroplast | 95% to gi 225440735 <i>Vitis vinifera</i> , E value: 2e-97    | 11.06-Disease/Defence/Detoxification                        | CC | 5.88 / 29237 | 8  | 77   | 29237 | NA   | 511.2606  | 1020.5066 | K.YPLVSDVTK.S                              |
|    |              |                                     |                            |             |                                                               |                                                             |    |              |    |      |       |      | 779.9015  | 1557.7884 | K.SYNVLIPDQGIALR.G                         |
| 26 | gi 116791989 | 60S ribosomal protein               | <i>Picea sitchensis</i>    | Cytosol     | 99% to gi 40287508 <i>Capsicum annuum</i> , E value: 1e-81    | 05.01-Protein synthesis/Ribosomal proteins                  | CC | 8.46 / 17788 | 13 | 82   | 17788 | 0.22 | 441.2190  | 880.4234  | K.IGPLGLSPK.K                              |
|    |              |                                     |                            |             |                                                               |                                                             |    |              |    |      |       |      | 619.3317  | 1236.6488 | K.VAVVPSAAALVIK.A                          |
|    | gi 51061329  | Small GTP-binding protein           | <i>Antirrhinum majus</i>   | Chloroplast | 93% to gi 255570175 <i>Ricinus communis</i> , E value: 4e-108 | 10.0410-Signal transduction/G proteins                      | CC | 8.49 / 28765 | 10 | 133  | 28765 | 0.13 | 568.2561  | 1134.4976 | K.YIIIGDTGVGK.S                            |
|    |              |                                     |                            |             |                                                               |                                                             |    |              |    |      |       |      | 854.8400  | 1707.6654 | K.IQEGVFDVSNESGIK.V                        |
| 27 | gi 27544454  | Pectinmethylesterase inhibitor      | <i>Actinidia deliciosa</i> | Cytosol     |                                                               | 09.01-Cell structure/Cell wall                              | N  | 4.97 / 19878 | 15 | 171  | 19878 | 0.42 | 686.3167  | 1370.6188 | K.IIASLTNQATDPK.L                          |
|    |              |                                     |                            |             |                                                               |                                                             |    |              |    |      |       |      | 753.3262  | 1504.6378 | K.GLGQFSIDIAQASAK.Q                        |
|    | gi 146737976 | Thaumatococin                       | <i>Actinidia deliciosa</i> | Apoplast    |                                                               | 11.02-Disease/defense/Defense-related                       | N  | 7.92 / 21614 | 18 | 164  | 21614 | 0.63 | 527.6749  | 1053.3352 | R.TGCNFDGAGR.G + Carbamidomethyl (C)       |
|    |              |                                     |                            |             |                                                               |                                                             |    |              |    |      |       |      | 711.2642  | 1420.5138 | R.APGGCNNPCTVFK.T + 2 Carbamidomethyl (C)  |
|    |              |                                     |                            |             |                                                               |                                                             |    |              |    |      |       |      | 824.3041  | 1646.5936 | K.CTADINGQCPNELR.A + 2 Carbamidomethyl (C) |
|    | gi 255538956 | Peptidyl-prolyl cis-trans isomerase | <i>Ricinus communis</i>    | Cytosol     |                                                               | 06.01-Protein destination and storage/Folding and stability | N  | 8.94 / 18142 | 15 | 89   | 18142 | 0.21 | 704.8013  | 1407.5880 | R.IVMELFADTTPR.T + Oxidation (M)           |

|    |              |                                             |                              |                                                                 |                                                   |    |              |    |     |       |      |           |           |                                               |
|----|--------------|---------------------------------------------|------------------------------|-----------------------------------------------------------------|---------------------------------------------------|----|--------------|----|-----|-------|------|-----------|-----------|-----------------------------------------------|
|    |              |                                             |                              |                                                                 |                                                   |    |              |    |     |       |      | 712.7964  | 1423.5782 | K.VFFDMTVGGAPAGR.I                            |
| 28 | gi 281552896 | Bet v 1 related allergen                    | <i>Actinidia chinensis</i>   | Unclear                                                         | 11.02-Disease/defense/Defense-related             | CC | 5.82 / 17479 | 42 | 582 | 17479 | 3.07 | 417.1697  | 832.3248  | K.VSEEEIK.L                                   |
|    |              |                                             |                              |                                                                 |                                                   |    |              |    |     |       |      | 617.2579  | 1232.5012 | K.ILEGDGCAGTIK.E + Carbamidomethyl (C)        |
|    |              |                                             |                              |                                                                 |                                                   |    |              |    |     |       |      | 638.7453  | 1275.4760 | K.IVACPDGGSICK.N + 2 Carbamidomethyl (C)      |
|    |              |                                             |                              |                                                                 |                                                   |    |              |    |     |       |      | 644.7900  | 1287.5654 | K.AFILDGDTLVPK.V                              |
|    |              |                                             |                              |                                                                 |                                                   |    |              |    |     |       |      | 677.7414  | 1353.4682 | M.GVVITYDMEIPSK.V + Oxidation (M)             |
|    |              |                                             |                              |                                                                 |                                                   |    |              |    |     |       |      | 756.7594  | 1511.5042 | K.ALEAYLLANPDYC.- + Carbamidomethyl (C)       |
|    | gi 62738429  | Pectinmethylesterase inhibitor              | <i>Actinidia chinensis</i>   | Cytosol                                                         | 09.01-Cell structure/Cell wall                    | CC | 4.60 / 16414 | 30 | 338 | 16414 | 0.89 | 686.3095  | 1370.6044 | K.IIASLTNQATDPK.L                             |
|    |              |                                             |                              |                                                                 |                                                   |    |              |    |     |       |      | 753.3401  | 1504.6656 | K.GLGQFSIDIAQASAK.Q                           |
|    |              |                                             |                              |                                                                 |                                                   |    |              |    |     |       |      | 1067.8934 | 2133.7722 | R.YETCSENYADAIDSLGQAK.Q + Carbamidomethyl (C) |
|    | gi 220682974 | UDP-glucose-1-phosphate uridylyltransferase | <i>Saccharum officinarum</i> | Cytosol                                                         | 01.05-Metabolism/Sugars and polysaccharides       | CC | 5.24 / 52260 | 5  | 126 | 52260 | 0.15 | 649.3019  | 1296.5892 | K.LEIPDGA VLENK.D                             |
|    |              |                                             |                              |                                                                 |                                                   |    |              |    |     |       |      | 792.3529  | 1582.6912 | R.ANPANPSIELGPEFK.K                           |
|    | gi 8529430   | Eukaryotic translation initiation factor 5A | <i>Medicago truncatula</i>   | Unclear                                                         | 05.04-Protein synthesis/Translation factors       | CC | 5.33 / 19955 | 16 | 153 | 19955 | 0.42 | 424.6937  | 847.3728  | K.VVEVSTSK.T                                  |
|    |              |                                             |                              | 96% to gi 217071678 <i>Medicago truncatula</i> . E value: 3e-83 |                                                   |    |              |    |     |       |      | 567.7457  | 1133.4768 | K.TYPQQAGTIR.K                                |
|    |              |                                             |                              |                                                                 |                                                   |    |              |    |     |       |      | 685.8221  | 1369.6296 | K.LPTDDNLLTQIK.E                              |
| 29 | gi 281552896 | Bet v 1 related allergen                    | <i>Actinidia chinensis</i>   | Unclear                                                         | 11.02-Disease/defense/Defense-related             | N  | 5.82 / 17479 | 27 | 159 | 17479 | 0.83 | 417.1681  | 832.3216  | K.VSEEEIK.L                                   |
|    |              |                                             |                              |                                                                 |                                                   |    |              |    |     |       |      | 617.2529  | 1232.4912 | K.ILEGDGCAGTIK.E + Carbamidomethyl (C)        |
|    |              |                                             |                              |                                                                 |                                                   |    |              |    |     |       |      | 638.7468  | 1275.4790 | K.IVACPDGGSICK.N + 2 Carbamidomethyl (C)      |
|    |              |                                             |                              |                                                                 |                                                   |    |              |    |     |       |      | 644.7963  | 1287.5780 | K.AFILDGDTLVPK.V                              |
|    | gi 48828052  | Nucleoside diphosphate kinase               | <i>Gossypium raimondii</i>   | Cytosol                                                         | 01.03-Metabolism/Nucleotides                      | N  | 6.20 / 15840 | 26 | 173 | 15840 | 0.25 | 482.1970  | 962.3794  | R.GDFAIDIGR.N                                 |
|    |              |                                             |                              | 92% to gi 284433792 <i>Jatropha curcas</i> . E value: 4e-57     |                                                   |    |              |    |     |       |      | 685.7789  | 1369.5432 | R.NVIHGSDS VESAR.K                            |
|    |              |                                             |                              |                                                                 |                                                   |    |              |    |     |       |      | 784.3596  | 156..7046 | K.IIGATNPAESAPGTIR.G                          |
| 30 |              | Unidentified                                |                              |                                                                 | 30-Unknown                                        | N  |              |    |     |       |      |           |           |                                               |
| 31 | gi 75224035  | Cystatin                                    | <i>Actinidia deliciosa</i>   | Apoplast                                                        | 06.13-Protein destination and storage/Proteolysis | N  | 9.39 / 12748 | 21 | 307 | 12748 | 0.71 | 664.8123  | 1327.6100 | R.GYTQVVAGTNYR.L                              |



|                                  |                             |         |                                                               |                                            |   |               |    |     |       |          |          |           |                                     |
|----------------------------------|-----------------------------|---------|---------------------------------------------------------------|--------------------------------------------|---|---------------|----|-----|-------|----------|----------|-----------|-------------------------------------|
| 60S ribosomal protein            | <i>Solanum lycopersicum</i> | Cytosol | 97% to gi 76161008 <i>Solanum tuberosum</i> . E value: 9e-66  | 05.01-Protein synthesis/Ribosomal proteins | N | 10.28 / 16920 | 20 | 148 | 16920 | 0.51     | 775.3577 | 1548.7008 | K.QANDELQYQSVVR.G                   |
|                                  |                             |         |                                                               |                                            |   |               |    |     |       |          | 432.2404 | 862.4662  | R.VALVNYGK.D                        |
|                                  |                             |         |                                                               |                                            |   |               |    |     |       |          | 551.7636 | 1101.5126 | R.ALVDAPDMVR.S + Oxidation (M)      |
| Glycine-rich RNA binding protein | <i>Solanum tuberosum</i>    | Nucleus | 95% to gi 187373099 <i>Nicotiana tabacum</i> . E value: 8e-41 | 11.05-Disease/Defence/Stress responses     | N | 11.54 / 36051 | 11 | 143 | NA    | 530.7712 | 624.8073 | 1247.6000 | K.TLIAAMEAADVK.N + Oxidation (M)    |
|                                  |                             |         |                                                               |                                            |   |               |    |     |       |          | 530.7712 | 1059.5278 | R.LTLPVFNTR.S                       |
|                                  |                             |         |                                                               |                                            |   |               |    |     |       |          | 566.2648 | 1130.5150 | R.NITVNEAQRS.G                      |
|                                  |                             |         |                                                               |                                            |   |               |    |     |       |          | 753.7990 | 1505.5834 | R.DAIEGMNGQDL DGR.N + Oxidation (M) |

<sup>a</sup> *Zone N°*, zones label on the reference 1D-SDS-PAGE gel as shown in Figure 6;

<sup>b</sup> *Accession number*, accession number in NCBI database;

<sup>c</sup> *Organism*, organism in which the protein has been identified;

<sup>d</sup> *Protein name*, identified peptide names;

<sup>e</sup> *Cellular localization*, Sub-cellular localization of proteins was assigned based on database searches;

<sup>f</sup> *Matching criteria*, adopted criteria for the valuation of similarity for proteins identified after manual blast against current databases. Blank cells correspond to proteins readily identified without further blast;

<sup>g</sup> *Function category*, proteins ontologically classified into functional categories proposed by of Bevan et al., 1998, Nature 39, 1485-488;

<sup>h</sup> *Carbonylation status*, CC, candidate carbonylated; N, no;

<sup>i</sup> *Theoretical pI/Mw*, theoretical isoelectric point/molecular weight;

<sup>j</sup> *% Cov*, Mascot coverage %, percentage of sequence coverage obtained with identified peptides with Mascot software for the orthologous protein;

<sup>k</sup> *Score*, a minimum of two different peptides was used (score>46 for search in NCBI nr and score>63 when using the EST database); for proteins characterized by only one peptide, this peptide must contain at least five consecutive fragments (y or b) and yield a score >46;

<sup>l</sup> *Exponentially Modified Protein Abundance Index*: approximate, label-free, relative quantitation of the proteins in a mixture based on protein coverage by the peptide matches in a database search result (Ishihama et al., 2005, Molecular and Cellular Proteomics 4, 1265-1272);

<sup>m</sup> *Sequences*, list of peptides identified with Mascot software.

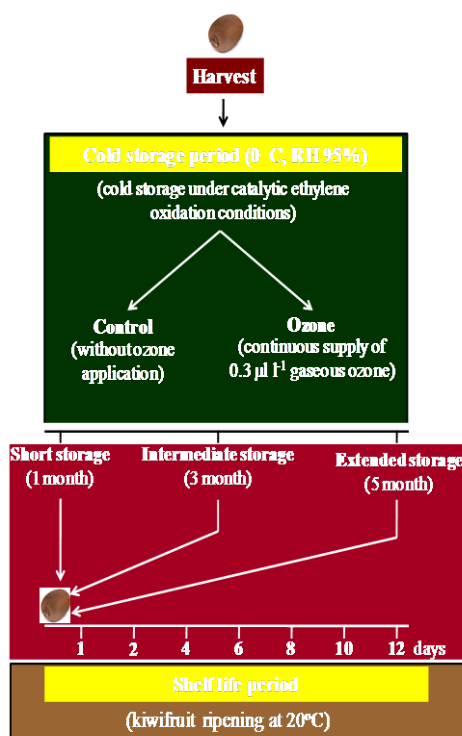

**Figure S1.** Scheme summarizing the experimental setup. Kiwifruits (cv. Hayward) were cold stored (0°C, 95% RH) for 1 month (short storage), 3 months (intermediate storage) or 5 months (extended storage) under catalytic ethylene oxidation conditions in the absence (control) or in the presence of 0.3 µl l<sup>-1</sup> gaseous ozone (ozone treatment) followed by 12 days of ripening under shelf life conditions (20°C). Ethylene production and respiration were evaluated every 2 days of ripening whereas physicochemical (fruit firmness, soluble solids content and titratable acidity) and antioxidant (antioxidant capacity, ascorbic acid and phenolic contents) properties were analyzed at 1, 6 and 12 days of ripening under shelf life. The anti-radical activity of kiwifruit extracts was tested at 1 day shelf life following 1, 3 or 5 months of cold storage. 1D-SDS-PAGE and mass spectrometry analysis along with Oxyblot assays were conducted at 1, 6 or 12 days of shelf life after 5 months of cold storage.

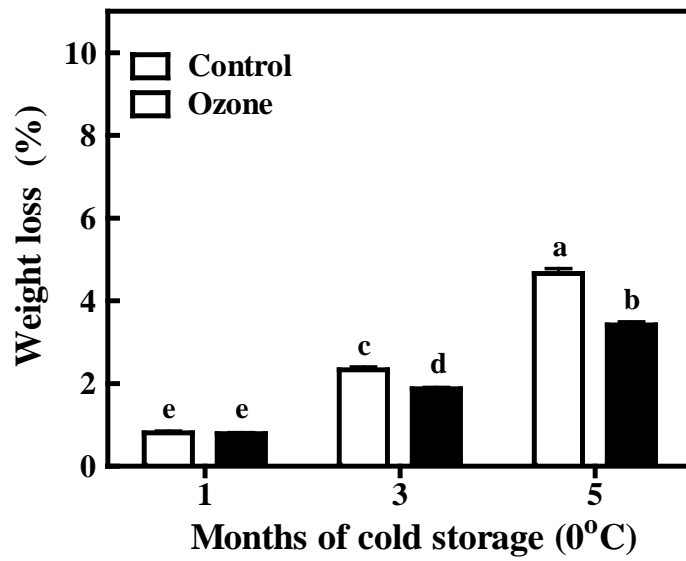

**Figure S2.** Weight loss (expressed as the percentage of the initial weight at harvest) of kiwifruits (cv. Hayward) after cold storage (0°C, 95% RH) in the absence (control) or in the presence of ozone (0.3  $\mu\text{l l}^{-1}$ ) for 1, 3 or 5 months plus 1 day of shelf life (20°C). Bars for followed by the same letter are not statistically significant according to Duncan's multiple range test ( $P < 0.05$ ). Values are means  $\pm$  SE ( $n = 20$ ).

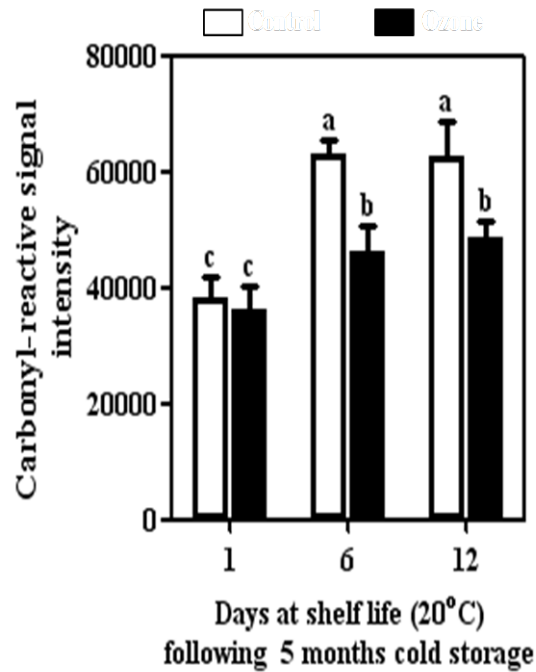

**Figure S3.** Relative abundance (arbitrary units) of carbonyl-reactive signal of the immunoblots in Figure 7A. Quantitative calculations were conducted using the calibrated densitometer and the Quantity One software for each entire gel lane. Bars followed by the same letter are not statistically significant according to Duncan's multiple range test ( $P < 0.05$ ). Values are means  $\pm$  SE ( $n = 3$ ).
